# Supplementary material for: Various Anti-HSPA2 Antibodies Yield Different Results in Studies on Cancer-Related Functions of Heat Shock Protein A2
Source: MDPI journal article supplement (doi:10.3390/ijms21124296), 2020-06-16
Supplement: s1 [file s1]

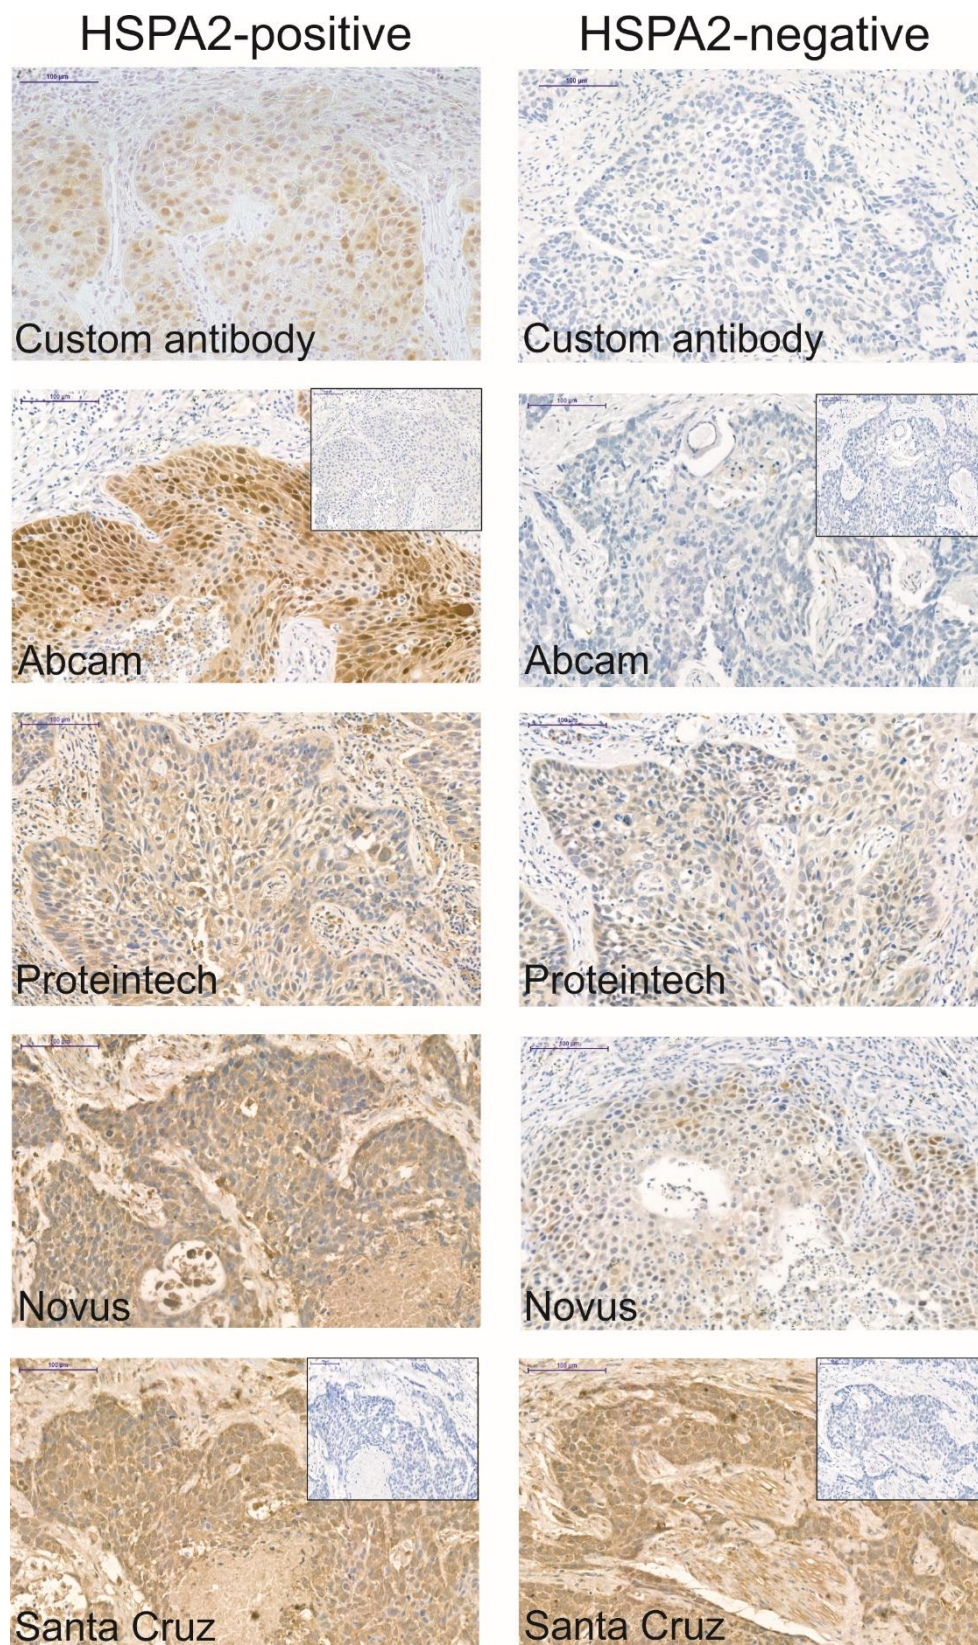

**Figure S1.** Results of immunostaining in NSCLC samples using specific and validated custom anti-HSPA2 antibody and commercially available anti-HSPA2 antibodies. Tissue specimens, after citric acid antigen retrieval were incubated with primary antibody overnight at 4°C. The details on antibodies are collected in Table 2.

**Table S1.** Results of in vitro studies on HSPA2 impact on cancer cells phenotype.

| Tumor                   | Cell Lines                         | Method / Antibody                                         | Phenotype of HSPA2-Deficient Cells                                                                                                                                                                                                                            | Ref. |
|-------------------------|------------------------------------|-----------------------------------------------------------|---------------------------------------------------------------------------------------------------------------------------------------------------------------------------------------------------------------------------------------------------------------|------|
| cervical AD<br>BRCA     | HeLa,<br>MCF 7                     | siRNA-mediated<br>knockdown, TR /<br>custom made          | Senescent-like morphology, reduced<br>metabolic activity, growth arrest.                                                                                                                                                                                      | [1]  |
| cervical AD<br>BRCA     | HeLa,<br>MCF7                      | siRNA-mediated<br>knockdown, TR /<br>custom made          | Induction of apoptosis-like cell death,<br>apoptosis-like chromatin condensation,<br>reduction of LEDGF activity.                                                                                                                                             | [2]  |
| BLC                     | HTB-2, HTB-<br>9, HTB-1,<br>UMUC-3 | shRNA-mediated<br>knockdown, TR /<br>custom made          | Reduced proliferation, clone forming<br>ability and invading potential (HTB-1,<br>UMUC-3), reduced motility (HTB-1).                                                                                                                                          | [3]  |
| cervical<br>SCC<br>AD   | SiHa, CaSki,<br>C-33 A<br>HeLa     | shRNA-mediated<br>knockdown, TR /<br>custom made          | Reduced proliferation, clone forming<br>ability, motility (SiHa, CaSki), invading<br>potential.                                                                                                                                                               | [4]  |
| renal cell<br>carcinoma | A704,<br>ACHN,<br>Caki-1           | shRNA-mediated<br>knockdown, TR /<br>custom made          | Reduced proliferation, metabolic activity,<br>clone forming ability, motility, invading<br>potential (A704, Caki-1).                                                                                                                                          | [5]  |
| colorectal<br>cancer    | COLO205,<br>HCT116                 | shRNA-mediated<br>knockdown, TR /<br>custom made          | Reduction in proliferation, metabolic<br>activity, clone forming ability, motility,<br>invading potential.                                                                                                                                                    | [6]  |
| BRCA                    | MCF7,<br>MDA-MB-<br>231            | shRNA-mediated<br>knockdown, TR /<br>custom made          | Induction of spontaneous apoptosis, switch<br>to senescence. Reduced proliferation,<br>metabolic activity, clone forming ability,<br>motility, invading potential.                                                                                            | [7]  |
| OV<br>ovary AD          | A-10<br>Caov-3,<br>SKOV3           | shRNA-mediated<br>knockdown, /<br>custom made             | Induction of spontaneous apoptosis, switch<br>to senescence. Reduced proliferation,<br>metabolic activity, clone forming ability,<br>motility, invading potential.                                                                                            | [8]  |
| NSCLC                   | NCI-H23,<br>NCI-H1299              | shRNA-mediated<br>knockdown,<br>stable / Abcam<br>EPR4596 | No effect on growth, metabolic activity,<br>clone forming ability, resistance to<br>platinum derivatives and bortezomib.<br>Similar phenotype showed cells deficient<br>in HSPA1. Pan-HSPA inhibition reduced<br>metabolic activity and activated cell death. | [9]  |
| lung AD                 | A549, NCI-<br>H1975                | siRNA-mediated<br>knockdown / no<br>data                  | Reduced proliferation, G1/S cell cycle<br>arrest mediated in part via activation of<br>the Erk1/2 pathway and probably<br>IRE1 $\alpha$ /PERK-mediated endoplasmic<br>reticulum stress.                                                                       | [10] |

**Abbreviations:** AD, adenocarcinoma; BLC, Bladder Urothelial Carcinoma; BRCA, Breast invasive carcinoma; OV, ovarian serous cystadenocarcinoma; NSCLC, non-small cell lung carcinoma; SCC, squamous cell carcinoma; TR, transient

#### References:

1. Rohde, M.; Daugaard, M.; Jensen, M.H.; Helin, K.; Nylandsted, J.; Jäättelä, M. Members of the heat-shock protein 70 family promote cancer cell growth by distinct mechanisms. *Genes Dev.* **2005**, *19*, 570-582.
2. Daugaard, M.; Kirkegaard-Sørensen, T.; Ostensfeld, M.S.; Aaboe, M.; Høyer-Hansen, M.; Orntoft, T.F.; Rohde, M.; Jäättelä, M. Lens epithelium-derived growth factor is an Hsp70-2 regulated guardian of lysosomal stability in human cancer. *Cancer Res.* **2007**, *67*, 2559-2567.

3. Garg, M.; Kanojia, D.; Saini, S.; Suri, S.; Gupta, A.; Surolia, A.; Suri, A. Germ cell-specific heat shock protein 70-2 is expressed in cervical carcinoma and is involved in the growth, migration, and invasion of cervical cells. *Cancer* **2010a**, *116*, 3785-3796.
4. Garg, M.; Kanojia, D.; Seth, A.; Kumar, R.; Gupta, A.; Surolia, A.; Suri, A. Heat-shock protein 70-2 (HSP70-2) expression in bladder urothelial carcinoma is associated with tumour progression and promotes migration and invasion. *Eur. J. Cancer* **2010b**, *46*, 207-215.
5. Singh, S.; Suri, A. Targeting the testis-specific heat-shock protein 70-2 (HSP70-2) reduces cellular growth, migration, and invasion in renal cell carcinoma cells. *Tumour Biol.* **2014**, *35*, 12695-12706.
6. Jagadish, N.; Agarwal, S.; Gupta, N.; Fatima, R.; Devi, S.; Kumar, V.; Suri, V.; Kumar, R.; Suri, V.; Sadasukhi, T.C.; Gupta, A.; Ansari, A.S.; Lohiya, N.K.; Suri, A. Heat shock protein 70-2 (HSP70-2) overexpression in breast cancer. *J. Exp. Clin. Cancer Res.* **2016b**, *35*, 150.
7. Jagadish, N.; Parashar, D.; Gupta, N.; Agarwal, S.; Suri, V.; Kumar, R.; Suri, V.; Sadasukhi, T.C.; Gupta, A.; Ansari, A.S.; Lohiya, N.K.; Suri, A. Heat shock protein 70-2 (HSP70-2) is a novel therapeutic target for colorectal cancer and is associated with tumor growth. *BMC Cancer* **2016a**, *16*, 561.
8. Gupta, N.; Jagadish, N.; Surolia, A.; Suri, A. Heat shock protein 70-2 (HSP70-2) a novel cancer testis antigen that promotes growth of ovarian cancer. *Am. J. Cancer Res.* **2017**, *7*, 1252-1269.
9. Sojka, D.R.; Gogler-Piğłowska, A.; Vydra, N.; Cortez, A.J.; Filipczak, P.T.; Krawczyk, Z.; Scieglinska, D. Functional redundancy of HSPA1, HSPA2 and other HSPA proteins in non-small cell lung carcinoma (NSCLC); an implication for NSCLC treatment. *Sci. Rep.* **2019**, *9*, 14394.
10. Cao, L.; Yuan, X.; Bao, F.; Lv, W.; He, Z.; Tang, J.; Han, J.; Hu, J. Downregulation of HSPA2 inhibits proliferation via ERK1/2 pathway and endoplasmic reticular stress in lung adenocarcinoma. *Ann. Transl. Med.* **2019**, *7*, 540.
